# Supplementary material for: Applications of generative artificial intelligence in outcome prediction in intensive care medicine—a scoping review
Source: Frontiers journal article supplement (doi:10.3389/fdgth.2025.1633458), 2025-08-05
Supplement: Data_Sheet_1.pdf [file Data_Sheet_1.pdf]

# Supplementary Material

## Table of Contents

|                                                                                                               |   |
|---------------------------------------------------------------------------------------------------------------|---|
| SUPPLEMENTAL FILE 1. SEARCH STRATEGY .....                                                                    | 2 |
| SUPPLEMENTAL FILE 2. PAPERS EXCLUDED AFTER ABSTRACT SCREENING AND, WHERE NECESSARY, FULL TEXT<br>REVIEW ..... | 3 |

## Supplemental File 1. Search strategy

**Table S1: Search strategy**

| Database       | Search string                                                                                                                                                                                                                                                                                                                                                                                                                                                                                                                                                                                                                                                                           |
|----------------|-----------------------------------------------------------------------------------------------------------------------------------------------------------------------------------------------------------------------------------------------------------------------------------------------------------------------------------------------------------------------------------------------------------------------------------------------------------------------------------------------------------------------------------------------------------------------------------------------------------------------------------------------------------------------------------------|
| IEEE Explore   | ("All Metadata":generative artificial intelligence OR "All Metadata":generative AI OR "All Metadata":GenAI OR "All Metadata":generative machine learning OR "All Metadata":generative adversarial network OR "All Metadata":large language model OR "All Metadata":LLM OR "All Metadata":variational autoencoder OR "All Metadata":diffusion model) AND ("All Metadata":intensive care OR "All Metadata":intensive medicine OR "All Metadata":ICU OR "All Metadata":critical care) AND ("All Metadata":outcome OR "All Metadata":sepsis OR "All Metadata":mortality OR "All Metadata":survival)                                                                                         |
| PubMed         | ((("generative artificial intelligence" OR "generative AI" OR genAI OR "generative machine learning" OR "generative adversarial network" OR "large language model" OR LLM OR "variational autoencoder" OR "diffusion model") AND ("intensive care"[Title/Abstract] OR "intensive medicine"[Title/Abstract] OR ICU[Title/Abstract] OR "critical care"[Title/Abstract])) AND (outcome[Title/Abstract] OR sepsis[Title/Abstract] OR mortality[Title/Abstract] OR survival[Title/Abstract]))                                                                                                                                                                                                |
| CINAHL         | (generative artificial intelligence or generative AI or generative machine learning or generative adversarial network or large language model or LLM or variational autoencoder) AND AB (intensive care or intensive medicine or ICU or critical care) AND AB (outcome or sepsis or mortality or survival)                                                                                                                                                                                                                                                                                                                                                                              |
| Google Scholar | The general term "generative artificial intelligence" was used in combination with different specific keywords, including "critical", "care", "intensive", "medicine", and "ICU":<br>allintitle: critical "generative artificial intelligence"<br>allintitle: care "generative artificial intelligence"<br>allintitle: intensive "generative artificial intelligence"<br>allintitle: medicine "generative artificial intelligence"<br>allintitle: icu "generative artificial intelligence"<br>The search was repeated three times with "generative adversarial network", "large language model", and "variational autoencoder" replacing the term "generative artificial intelligence". |
| arXiv          | AND all=generative artificial intelligence; AND all=intensive; AND all=medicine; AND all=outcome<br>The search was repeated three times with "generative adversarial network", "large language model", and "variational autoencoder" replacing the term "generative artificial intelligence".                                                                                                                                                                                                                                                                                                                                                                                           |

Supplemental File 2. Papers excluded after abstract screening and, where necessary, full text review

**Table S2: Papers excluded after the screening of abstracts and reports where necessary**

| Authors                                                                | Title                                                                                                                                   | Publication year | DOI                                | Reason for exclusion                                                                                                                 |
|------------------------------------------------------------------------|-----------------------------------------------------------------------------------------------------------------------------------------|------------------|------------------------------------|--------------------------------------------------------------------------------------------------------------------------------------|
| <b>IEEE</b>                                                            |                                                                                                                                         |                  |                                    |                                                                                                                                      |
| A. Rozo; V. Miskovic; T. Rose; E. Keersebilck; C. Iorio; C. Varon      | A Deep Learning Image-to-Image Translation Approach for a More Accessible Estimator of the Healing Time of Burns                        | 2023             | 10.1109/TBME.2023.3267600          | No: other area: burns, imaging, Laser Doppler imaging (LDI)                                                                          |
| G. Kumar                                                               | A Doctor Assistance Tool: Personalized Healthcare Treatment Recommendations Journey from Deep Reinforcement Learning to Generative AI   | 2024             | 10.1109/DELCON64804.2024.10866814  | No, other purpose: LLM generates treatment recommendations                                                                           |
| M. Mahalakshmi; S. Bharadwaj; A. N. Bhuyan                             | A Real-Time Medical Report Analysis and AI-Powered Diagnosis: A Cloud-Based Solution for Improved Patient Care                          | 2024             | 10.1109/ICAIT61638.2024.10690733   | No: other purpose, patient reports used for diagnostics                                                                              |
| L. Jiang; X. Yang; C. Yu; Z. Wu; Y. Wang                               | Advanced AI Framework for Enhanced Detection and Assessment of Abdominal Trauma: Integrating 3D Segmentation with 2D CNN and RNN Models | 2024             | 10.1109/RAIIC61787.2024.10671250   | No: no generative model, images: analysis of CT Scans                                                                                |
| R. Kumar; R. Bhagwat; A. Kumar V                                       | Advanced Neural Network Models for Predictive Analytics and Healthcare Management in Neurodegenerative Diseases                         | 2023             | 10.1109/ICRASET59632.2023.10419967 | No: other area, neurodegenerative diseases                                                                                           |
| Y. Wang; C. Li; Z. Wang                                                | Advancing Precision Medicine: VAE Enhanced Predictions of Pancreatic Cancer Patient Survival in Local Hospital                          | 2024             | 10.1109/ACCESS.2023.3348810        | No: other area VAE-augmented framework in pancreatic cancer                                                                          |
| M. Makram; A. Mohammcd                                                 | AI Applications in Medical Reporting and Diagnosis                                                                                      | 2024             | 10.1109/MIUCC62295.2024.10783552   | No: other area: liver disease, LLM to analyse images and clinical notes                                                              |
| F. Shah-Mohammadi; J. Finkelstein                                      | AI-Powered Social Determinants of Health Extraction from Patient Records: A GPT-Based Investigation                                     | 2024             | 10.1109/AIMHC59811.2024.00028      | No: other purpose, GPT (Generative Pretrained Transformer) model for extraction of addiction status from patient discharge summaries |
| A. R. Neravetla; S. Samreen; A. S. Mohammed; N. Jiwani; J. Logeshwaran | An Improved Lung Cancer Prediction Algorithm using Generative Adversarial Network in Modern Healthcare                                  | 2024             | 10.1109/ICICACS60521.2024.10498818 | No: other area: lung cancer                                                                                                          |
| Y. Ji; Z. Yu; Y. Wang                                                  | Assertion Detection in Clinical Natural Language Processing Using Large Language Models                                                 | 2024             | 10.1109/ICHI61247.2024.00039       | No: other area: assertion detection when extracting medical concepts from clinical notes using LLMs                                  |
| Y. An; R. Qiu; L. Guo; X. Chen                                         | Attention-based Multimodal Fusion with Adversarial Network for In-Hospital Mortality Prediction                                         | 2024             | 10.1109/BIBM62325.2024.10821815    | No: no data are generated, prediction based on the most relevant features                                                            |
| K. M. S. Islam; A. S. Nipu; P. Madiraju; P. Deshpande                  | Autocompletion of Chief Complaints in the Electronic Health Records using Large Language Models                                         | 2023             | 10.1109/BigData59044.2023.10386778 | No: other area, chief complaint, no ICU                                                                                              |

| Authors                                                                                   | Title                                                                                                                                                  | Publication year | DOI                               | Reason for exclusion                                                                                                                                                                        |
|-------------------------------------------------------------------------------------------|--------------------------------------------------------------------------------------------------------------------------------------------------------|------------------|-----------------------------------|---------------------------------------------------------------------------------------------------------------------------------------------------------------------------------------------|
| E. Estiri; H. Mirinejad                                                                   | Bayesian Variational Autoencoders for Out-of-Distribution Detection in Physiological Modeling: A Case Study in Fluid Therapy                           | 2024             | 10.1109/EMBC53108.2024.10781780   | No: other area: a case study in fluid therapy                                                                                                                                               |
| V. B. Oguluri; M. S. N. Raju; J. Vaka; V. Murukutla                                       | Classification of Acute Lymphoblastic Leukemia Using MobileNet and EfficientNetB3                                                                      | 2023             | 10.1109/ICBDS58040.2023.10346455  | No: other area, acute lymphoblastic leukaemia                                                                                                                                               |
| A. Mendoza; S. Tume; K. Puri; S. Acosta; J. R. Cavallaro                                  | Clinical Features and Physiological Signals Fusion Network for Mechanical Circulatory Support Need Prediction in Pediatric Cardiac Intensive Care Unit | 2025             | 10.1109/JBHI.2024.3510217         | No: no generative model                                                                                                                                                                     |
| K. L. Prasanna; Y. N. Rao                                                                 | Context-Aware Approaches in IoT-based Healthcare Systems using Deep Learning Techniques: A Study                                                       | 2024             | 10.1109/ICAAIC60222.2024.10575875 | No: other area, reviewed IoT-enabled medical care systems using context awareness                                                                                                           |
| Shruthi K; Naveen K B                                                                     | DEEP Learning Approach Using Modified Auto-Encoder for PPG Signal Compression                                                                          | 2023             | 10.1109/ICTBIG59752.2023.10456180 | No: other purpose, encoder/decoder model for the heart's pumping capacity                                                                                                                   |
| W. Wu; Y. Lu; R. Mane; C. Guan                                                            | Deep Learning for Neuroimaging Segmentation with a Novel Data Augmentation Strategy                                                                    | 2020             | 10.1109/EMBC44109.2020.9176537    | No: other area: neuro-imaging, a conditional Generative Adversarial Network (cGAN) which is followed by a supervised segmentation with a Convolutional Neural Network (CNN) of brain images |
| M. Mohammed; S. Atiani; R. A. A. Rub; F. F. Kharbat; M. Odeh                              | Deriving Data Modeling Requirements Using Topic Modelling in Cancer Care Context: The Case of the iCanViz Project                                      | 2023             | 10.1109/ICCNS58795.2023.10193611  | No: other area: cancer incidence                                                                                                                                                            |
| A. M. Alshahrani; H. Farooq Ahmad; J. Hussain                                             | Detecting Health Misinformation on Social Networking Sites Using Large Language Models and Deep Learning-based Natural Language Processing             | 2024             | 10.1109/FLLM63129.2024.10852503   | No: other area, not related to EHR data                                                                                                                                                     |
| S. Nagoor; L. Hederman; K. Koidl; I. Martin-Loeches                                       | Distinguishing Clinical Sentiment in Intensive Care Unit Clinical Notes                                                                                | 2024             | 10.1109/CBMS61543.2024.00049      | No: other area: sentiment analysis in critical care notes using lexicon models, BERT models, and prompt models                                                                              |
| M. M. Alqezweeni; V. I. Gorbachenko; O. K. Zenin; D. N. Gribkov; V. V. Potapov; I. Milykh | Early Diagnoses of Chronic Heart Failure using Neural Network Classifier of Tensiometric Blood Test Results                                            | 2022             | 10.1109/ICDSIC56987.2022.10076007 | No: other area: early diagnosis of chronic heart failure, training data generated with VAE because of insufficiency                                                                         |
| D. Raj; J. A J; R. Rafeeq; R. T S; A. S; M. K P                                           | Enhancing Seizure Detection Through Deep Learning-Based Wearable Devices                                                                               | 2024             | 10.1109/ICIC3S61846.2024.10603386 | No: other area: automated seizure detection from wearable device data                                                                                                                       |
| W. Cai; Y. Li; Y. Chen; J. Lin; Z. Huang; P. Gao; T. R. Gadekallu; W. Wang; Y. Gao        | Enhancing Weakly Supervised Semantic Segmentation with Multi-label Contrastive Learning and LLM Features Guidance                                      | 2024             | 10.1109/JBHI.2024.3450013         | No: other area: histopathology, images, class-specific embedding extraction with LLM features guidance on histopathological images                                                          |

| Authors                                                                     | Title                                                                                                                                    | Publication year | DOI                               | Reason for exclusion                                                                                                                                                                                                                             |
|-----------------------------------------------------------------------------|------------------------------------------------------------------------------------------------------------------------------------------|------------------|-----------------------------------|--------------------------------------------------------------------------------------------------------------------------------------------------------------------------------------------------------------------------------------------------|
| A. Zalewski; W. Long; A. E. W. Johnson; R. G. Mark; L. -w. H. Lehman        | Estimating patient's health state using latent structure inferred from clinical time series and text                                     | 2017             | 10.1109/BHI.2017.7897302          | No: no generative model: Hierarchical Dirichlet Processes to use multiple data sources including nursing notes                                                                                                                                   |
| Y. Zhou; D. Dreizin; Y. Wang; F. Liu; W. Shen; A. L. Yuille                 | External Attention Assisted Multi-Phase Splenic Vascular Injury Segmentation With Limited Data                                           | 2022             | 10.1109/TMI.2021.3139637          | No: other area, image augmentation, a novel framework for multi-phase splenic vascular injury segmentation                                                                                                                                       |
| C. Sibunruang; J. Polpinij                                                  | Finding Clinical Knowledge from MEDLINE Abstracts by Text Summarization Technique                                                        | 2018             | 10.23919/INCIT.2018.8584867       | No: other area, summarising text from Medline                                                                                                                                                                                                    |
| J. Wu; X. Ye; C. Mou; W. Dai                                                | FineEHR: Refine Clinical Note Representations to Improve Mortality Prediction                                                            | 2023             | 10.1109/ISDFS58141.2023.10131726  | No: other area, improving the prediction accuracy using embeddings and metric learning                                                                                                                                                           |
| S. Singh; S. Singh; C. S. Raghuvanshi                                       | Generating Synthetic Medical Data Using GAI                                                                                              | 2025             | 10.1002/9781394280735.ch3         | No: other area: Generative Computerized reasoning (GAI) in medicine in general                                                                                                                                                                   |
| M. Ehghaghi; P. -Y. Zhou; W. Y. Cheng; S. Rajabi; C. -H. Kuo; E. -S. A. Lee | Interpretable Disease Prediction from Clinical Text by Leveraging Pattern Disentanglement                                                | 2023             | 10.1109/BHI58575.2023.10313408    | No: other area, disease prediction, not ICU, processing clinical notes                                                                                                                                                                           |
| L. -w. Lehman; W. Long; M. Saeed; R. Mark                                   | Latent topic discovery of clinical concepts from hospital discharge summaries of a heterogeneous patient cohort                          | 2014             | 10.1109/EMBC.2014.6943952         | No: no generative model, Hierarchical Dirichlet Process (HDP) as a non-parametric topic modeling technique to automatically discover the latent "topic" structure of diseases, symptoms, and findings documented in hospital discharge summaries |
| H. -W. Hu; Y. -c. Lin; C. -H. Chia; E. Chuang; Y. Cheng Ru                  | Leveraging Large Language Models for Generating Personalized Care Recommendations in Dementia                                            | 2024             | 10.1109/iWEM59914.2024.10649066   | No, other purpose: a GPT-4 based LLM, integrating it with a vector database using RAG to optimize care plan personalization                                                                                                                      |
| M. A. H. Zahid; J. Lee                                                      | Mortality prediction with self normalizing neural networks in intensive care unit patients                                               | 2018             | 10.1109/BHI.2018.8333410          | No: SNN is not generative, use of ANN, but no new data produced, self normalizing neural network                                                                                                                                                 |
| A. Prasad; V. Asha; N. Tressa; D. Sharma; D. V; D. S                        | NeuroNet: A Deep Learning Framework for Stroke Analysis                                                                                  | 2024             | 10.1109/IDCIoT59759.2024.10467659 | No: other area, stroke prediction                                                                                                                                                                                                                |
| F. Scotti; D. Magnanimi; V. M. Urbano; F. Pierri                            | Online feelings and sentiments across Italy during pandemic: investigating the influence of socio-economic and epidemiological variables | 2020             | 10.1109/ASONAM49781.2020.9381463  | No: other area, analysing tweets during the pandemic                                                                                                                                                                                             |
| R. C. Pereira; P. H. Abreu; P. P. Rodrigues                                 | Partial Multiple Imputation With Variational Autoencoders: Tackling Not at Randomness in Healthcare Data                                 | 2022             | 10.1109/JBHI.2022.3172656         | No: other area, not ICU, VAE to impute EHR data                                                                                                                                                                                                  |

| Authors                                                                                                                                                                            | Title                                                                                                  | Publication year | DOI                                | Reason for exclusion                                                                                                                                                 |
|------------------------------------------------------------------------------------------------------------------------------------------------------------------------------------|--------------------------------------------------------------------------------------------------------|------------------|------------------------------------|----------------------------------------------------------------------------------------------------------------------------------------------------------------------|
| H. Xu; W. Wu; S. Nemati; H. Zha                                                                                                                                                    | Patient Flow Prediction via Discriminative Learning of Mutually-Correcting Processes                   | 2017             | 10.1109/TKDE.2016.2618925          | No: other area: patient flow prediction, data augmentation for patient flow modelling in class imbalance                                                             |
| J. Lee                                                                                                                                                                             | Personalized mortality prediction for the critically ill using a patient similarity metric and bagging | 2016             | 10.1109/BHI.2016.7455902           | No: no generative model, classification based on similarity between patients                                                                                         |
| Y. Dai; S. Lokhandwala; W. Long; R. Mark; L. -w. H. Lehman                                                                                                                         | Phenotyping hypotensive patients in critical care using hospital discharge summaries                   | 2017             | 10.1109/BHI.2017.7897290           | No: no generative model, Hierarchical Dirichlet Process, discovered topic structure in phenotyping critically-ill patients who experienced hypotensive episodes      |
| D. Hao; M. Negahdar                                                                                                                                                                | Predicting Outcomes in Long COVID Patients with Spatiotemporal Attention                               | 2023             | 10.1109/ICHI57859.2023.00031       | No: other area: Long COVID, spatial relation, a spatiotemporal attention mechanism to weigh feature importance jointly from the temporal dimension and feature space |
| N. S. Damanhuri; Y. S. Chiew; P. Docherty; P. Geoghegan; G. Chase                                                                                                                  | Respiratory airway resistance monitoring in mechanically ventilated patients                           | 2012             | 10.1109/IECBES.2012.6498135        | No: other purpose, assesses the efficacy of a physically derived airway branching model (ABM) to capture clinical data                                               |
| J. Lenin; A. Komathi; H. Vijayan; A. R. Rathinam; A. Kasthuri; C. Srinivasan                                                                                                       | Revolutionizing Healthcare With Cloud Computing: The Impact of Clinical Decision Support Algorithm     | 2023             | 10.1109/ICAIIHI57871.2023.10489022 | No: other area: advantages of cloud computing                                                                                                                        |
| E. Estiri; H. Mirinejad                                                                                                                                                            | Robust Nonlinear State Space Model Identification for Hemorrhage Resuscitation                         | 2023             | 10.1109/BHI58575.2023.10313391     | No: other area, predicting hemodynamic responses in hemorrhage resuscitation                                                                                         |
| N. M. Matasyoh; F. Mathis-Ullrich; R. A. Zeineldin                                                                                                                                 | SAMSurg: Surgical Instrument Segmentation in Robotic Surgeries Using Vision Foundation Model           | 2024             | 10.1109/ACCESS.2024.3520386        | No: other area, Integrating Minimally Invasive Surgery, instrument segmentation                                                                                      |
| D. Restrepo; L. F. Nakayama; R. G. Dychiao; C. Wu; L. G. McCoy; J. C. Artiaga; M. Cobanaj; J. Matos; J. Gallifant; D. S. Bitterman; V. Ferrer; Y. Aphinyanaphongs; L. Anthony Celi | Seeing Beyond Borders: Evaluating LLMs in Multilingual Ophthalmological Question Answering             | 2024             | 10.1109/ICHI61247.2024.00089       | No: other area: ophthalmology                                                                                                                                        |
| P. Bookanakere; S. S; S. Saniya; A. R; S. K. S                                                                                                                                     | Textual Therapies: Harnessing Language Models for Mental Health Insights                               | 2024             | 10.1109/ACROSET62108.2024.10743711 | No: other area, OpenAI's Generative Pre-Trained Transformer 2 (GPT-2) model to predict the presence of a mental illness                                              |
| M. Poongodi; M. Malviya; M. Hamdi; H. T. Rauf; S. Kadry; O. Thinnukool                                                                                                             | The Recent Technologies to Curb the Second-Wave of COVID-19 Pandemic                                   | 2021             | 10.1109/ACCESS.2021.3094400        | No: other area, out of scope, general issues of pandemic                                                                                                             |

| Authors                                                                                                                      | Title                                                                                                                                                                                                       | Publication year | DOI                              | Reason for exclusion                                                               |
|------------------------------------------------------------------------------------------------------------------------------|-------------------------------------------------------------------------------------------------------------------------------------------------------------------------------------------------------------|------------------|----------------------------------|------------------------------------------------------------------------------------|
| M. Sharma; B. Bhagat; V. Kumari; Bhumi; N. Sharma; D. Singh                                                                  | A Comparative Analysis of CNN and Transfer Learning Algorithms in Predicting Alzheimer's Disease Stages Using Neuroimaging                                                                                  | 2024             | 10.1109/OTCON60325.2024.10688232 | No: other area: Alzheimer's Disease                                                |
| B. Cánovas-Segura; F. Zerbato; B. Oliboni; C. Combi; M. Campos; A. Morales; J. M. Juarez; R. Marin; F. Palacios              | A Process-Oriented Approach for Supporting Clinical Decisions for Infection Management                                                                                                                      | 2017             | 10.1109/ICHL.2017.73             | No: other area: process for supporting clinical decisions for infection management |
| K. H. Khalaf; A. M. Khiavi; D. H. Abd                                                                                        | Adversarial Ensemble Learning for Mortality Prediction in Intensive Care Units                                                                                                                              | 2024             | 10.1109/DeSE63988.2024.10912041  | No: no generative model                                                            |
| F. Zhao; J. Nie; M. Ma; X. Chen; X. He; B. Wang; Y. Hou                                                                      | Assessing the Role of Different Heterogeneous Regions in DCE-MRI for Predicting Molecular Subtypes of Breast Cancer based on Network Architecture Search and Vision Transformer                             | 2023             | 10.1109/EMBC40787.2023.10340066  | No: other area: breast cancer                                                      |
| M. Bazargani; M. J. Heidari; M. Anvari-Fard; H. Soltanian-Zadeh                                                              | Comparison of Six MRI Sequence Combinations for Brain Tumor Segmentation Using U-Net                                                                                                                        | 2024             | 10.1109/ICBME64381.2024.10895163 | No: other area: brain tumor segmentation                                           |
| M. Shehata; F. Khalifa; A. Soliman; M. Ghazal; F. Taher; M. A. El-Ghar; A. C. Dwyer; G. Gimel'farb; R. S. Keynton; A. El-Baz | Computer-Aided Diagnostic System for Early Detection of Acute Renal Transplant Rejection Using Diffusion-Weighted MRI                                                                                       | 2019             | 10.1109/TBME.2018.2849987        | No: other area: acute renal transplant rejection                                   |
| Z. Ishak; A. S. A. Amran; M. D. Esfahani; R. K. Ayyasamy; M. O. B. Abdullah; Y. J. Ann                                       | Determining the Readiness Factors to Adapt Blockchain Technology in the Palm Oil Industry to Facilitate Circular Economy Transition                                                                         | 2024             | 10.1109/AiDAS63860.2024.10730330 | No: other area: blockchain technology in the palm oil industry                     |
| Y. Liu; X. Wang; X. Wang; Z. Wang; J. Kurths                                                                                 | Diffusion Source Inference for Large-Scale Complex Networks Based on Network Percolation                                                                                                                    | 2025             | 10.1109/TNNLS.2023.3321767       | No: other area: diffusion source inference                                         |
| P. Busaranuvong; E. Agu; D. Kumar; S. Gautam; R. S. Fard; B. Tulu; D. Strong                                                 | Guided Conditional Diffusion Classifier (ConDiff) for Enhanced Prediction of Infection in Diabetic Foot Ulcers                                                                                              | 2025             | 10.1109/OJEMB.2024.3453060       | No: other area: prediction of infection in diabetic foot ulcers                    |
| J. Huang                                                                                                                     | Notice of Violation of IEEE Publication Principles: Computational Model of Protein-Bound Uremic Toxins Kinetics During Hemodialysis and Dose Evaluation of Accurate Dialysis Using Deep Learning Techniques | 2020             | 10.1109/ACCESS.2020.2990725      | No: other area: model of protein-bound uremic toxins kinetics                      |
| D. Vrba; L. Malena; J. Albrecht; J. Fricova; M. Anders; R. Rokyta; D. Rodrigues; J. Vrba                                     | Numerical Analysis of Transcranial Magnetic Stimulation Application in Patients With Orofacial Pain                                                                                                         | 2022             | 10.1109/TNSRE.2022.3156703       | No: other area: transcranial magnetic stimulation                                  |
| C. Kim; C. U. Lehmann; D. Hatch; J. S. Schildcrout; D. J. France; Y. Chen                                                    | Provider Networks in the Neonatal Intensive Care Unit Associate with Length of Stay                                                                                                                         | 2019             | 10.1109/CIC48465.2019.00024      | No: other area: provider networks, length of stay                                  |
| J. S. Preston; T. Tasdizen; C. M. Terry; A. K. Cheung                                                                        | Using the Stochastic Collocation Method for the Uncertainty Quantification of Drug Concentration Due to Depot Shape Variability                                                                             | 2009             | 10.1109/TBME.2008.2009882        | No: other area: drug concentration                                                 |
| Q. Wu; W. Huang; S. Wang; H. Yu; L. Wang;                                                                                    | A generative adversarial network-based CT image standardization model                                                                                                                                       | 2021             | 10.1109/EMBC46164.2021.9630092   | No: other area: lung cancer, generative                                            |

| Authors                                                                                                                                                                                                                                                                                                                                                                                                                                                       | Title                                                                                                                                                        | Publication year | DOI                             | Reason for exclusion                                                                                                                                                                                              |
|---------------------------------------------------------------------------------------------------------------------------------------------------------------------------------------------------------------------------------------------------------------------------------------------------------------------------------------------------------------------------------------------------------------------------------------------------------------|--------------------------------------------------------------------------------------------------------------------------------------------------------------|------------------|---------------------------------|-------------------------------------------------------------------------------------------------------------------------------------------------------------------------------------------------------------------|
| Z. Wu; Y. Zhu; Z. Liu; H. Ma; J. Tian                                                                                                                                                                                                                                                                                                                                                                                                                         | for predicting progression-free survival of lung cancer                                                                                                      |                  |                                 | adversarial network (GAN)-based model to convert heterogenous CT images into standardized CT images with uniform slice thickness and reconstruction kernel to increase the generalization of the predictive model |
| M. Noaeen; S. Amini; S. Bhasker; Z. Ghezelsefli; A. Ahmed; O. Jafarinezhad; Z. S. H. Abad                                                                                                                                                                                                                                                                                                                                                                     | Unlocking the Power of EHRs: Harnessing Unstructured Data for Machine Learning-based Outcome Predictions                                                     | 2023             | 10.1109/EMBC40787.2023.10340232 | No: no generative model                                                                                                                                                                                           |
| <b>Pubmed</b>                                                                                                                                                                                                                                                                                                                                                                                                                                                 |                                                                                                                                                              |                  |                                 |                                                                                                                                                                                                                   |
| Subudhi S, Verma A, Patel AB, Hardin CC, Khandekar MJ, Lee H, McEvoy D, Stylianopoulos T, Munn LL, Dutta S, Jain RK.                                                                                                                                                                                                                                                                                                                                          | Comparing machine learning algorithms for predicting ICU admission and mortality in COVID-19                                                                 | 2021             | 10.1038/s41746-021-00456-x      | No: no generative model                                                                                                                                                                                           |
| Li Y, Song S, Zhu L, Zhang X, Mou Y, Lei M, Wang W, Tao Z.                                                                                                                                                                                                                                                                                                                                                                                                    | Machine learning-based prediction model for patients with recurrent Staphylococcus aureus bacteremia                                                         | 2025             | 10.1186/s12911-025-02878-z      | No: no generative model                                                                                                                                                                                           |
| Barrios EL, Mazer MB, McGonagill PW, Bergmann CB, Goodman MD, Gould RW, Rao M, Polcz VE, Davis RJ, Del Toro DE, Dirain ML, Dram A, Hale LO, Heidarian M, Kim CY, Kucaba TA, Lanz JP, McCray AE, Meszaros S, Miles S, Nelson CR, Rocha IL, Silva EE, Ungaro RF, Walton AH, Xu J, Zeumer-Spataro L, Drewry AM, Liang M, Bible LE, Loftus TJ, Turnbull IR, Efron PA, Remy KE, Brakenridge SC, Badovinac VP, Griffith TS, Moldawer LL, Hotchkiss RS, Caldwell CC. | Adverse outcomes and an immunosuppressed endotype in septic patients with reduced IFN- $\gamma$ ELISpot                                                      | 2024             | 10.1172/jci.insight.175785      | No: no generative model                                                                                                                                                                                           |
| Mateo J, Payen D, Ghout I, Vallée F, Lescot T, Welschbillig S, Tazarourte K, Azouvi P, Weiss JJ, Aegerter P, Vigué B.                                                                                                                                                                                                                                                                                                                                         | Impact of extended monitoring-guided intensive care on outcome after severe traumatic brain injury: A prospective multicentre cohort study (PariS-TBI study) | 2017             | 10.1080/02699052.2017.1370554   | No: no generative model                                                                                                                                                                                           |
| Brakenridge SC, Efron PA, Stortz JA, Ozrazgat-Baslanti T, Ghita G, Wang Z, Bihorac A, Mohr AM, Brumback BA, Moldawer LL, Moore FA.                                                                                                                                                                                                                                                                                                                            | The impact of age on the innate immune response and outcomes after severe sepsis/septic shock in trauma and surgical intensive care unit patients            | 2018             | 10.1097/TA.0000000000001921     | No: no generative model                                                                                                                                                                                           |
| Stortz JA, Mira JC, Raymond SL, Loftus TJ,                                                                                                                                                                                                                                                                                                                                                                                                                    | Benchmarking clinical outcomes and the immunocatabolic phenotype of                                                                                          | 2018             | 10.1097/TA.0000000000001758     | No: no generative model                                                                                                                                                                                           |



| Authors                                                                                                                                                                                  | Title                                                                                                                                                 | Publication year | DOI                           | Reason for exclusion                                                                   |
|------------------------------------------------------------------------------------------------------------------------------------------------------------------------------------------|-------------------------------------------------------------------------------------------------------------------------------------------------------|------------------|-------------------------------|----------------------------------------------------------------------------------------|
| Ozrazgat-Baslanti T, Wang Z, Ghita GL, Leeuwenburgh C, Segal MS, Bihorac A, Brumback BA, Mohr AM, Efron PA, Moldawer LL, Moore FA, Brakenridge SC.                                       | chronic critical illness after sepsis in surgical intensive care unit patients                                                                        |                  |                               |                                                                                        |
| Kuo RN, Chen W, Shau WY.                                                                                                                                                                 | Risk factors for disease progression and clinical outcomes in patients with COVID-19 in Taiwan: a nationwide population-based cohort study            | 2025             | 10.1186/s12890-024-03468-x    | No: no generative model                                                                |
| Subudhi S, Voutouri C, Hardin CC, Nikmaneshi MR, Patel AB, Verma A, Khandekar MJ, Dutta S, Stylianopoulos T, Jain RK, Munn LL.                                                           | Strategies to minimize heterogeneity and optimize clinical trials in Acute Respiratory Distress Syndrome (ARDS): Insights from mathematical modelling | 2022             | 10.1016/j.ebiom.2021.103809   | No: no generative model                                                                |
| Efron PA, Brakenridge SC, Mohr AM, Barrios EL, Polcz VE, Anton S, Ozrazgat-Baslanti T, Bihorac A, Guirgis F, Loftus TJ, Rosenthal M, Leeuwenburgh C, Mankowski R, Moldawer LL, Moore FA. | The persistent inflammation, immunosuppression, and catabolism syndrome 10 years later                                                                | 2023             | 10.1097/TA.00000000000004087  | No: other purpose: persistent inflammation, immunosuppression, and catabolism syndrome |
| Joe B, Park Y, Hamm J, Shin I, Lee J.                                                                                                                                                    | Exploiting Missing Value Patterns for a Backdoor Attack on Machine Learning Models of Electronic Health Records: Development and Validation Study     | 2022             | 10.2196/38440                 | No: other purpose: missing value patterns for a backdoor attack                        |
| El Gharib K, Jundi B, Furfaro D, Abdunour RE.                                                                                                                                            | AI-assisted human clinical reasoning in the ICU: beyond "to err is human"                                                                             | 2024             | 10.3389/frai.2024.1506676     | No: other purpose: AI-assisted human clinical reasoning                                |
| Kuo NI, Polizzotto MN, Finfer S, Garcia F, Sönnnerborg A, Zazzi M, Böhm M, Kaiser R, Jorm L, Barbieri S.                                                                                 | The Health Gym: synthetic health-related datasets for the development of reinforcement learning algorithms                                            | 2022             | 10.1038/s41597-022-01784-7    | No: other purpose: synthetic data for reinforcement learning                           |
| Qin W, Wang J, Huang F, Chen X.                                                                                                                                                          | Management for lower limb malperfusion in acute type a aortic dissection patients                                                                     | 2023             | 10.1177/02676591221116491     | No: lower limb malperfusion (LLM)                                                      |
| van Nispen C, Long B, Koyfman A.                                                                                                                                                         | High risk and low prevalence diseases: Stevens Johnson syndrome and toxic epidermal necrolysis                                                        | 2024             | 10.1016/j.ajem.2024.04.001    | No: other purpose: Stevens Johnson syndrome and toxic epidermal necrolysis             |
| Huespe IA, Echeverri J, Khalid A, Carboni Bisso I, Musso CG, Surani S, Bansal V, Kashyap R.                                                                                              | Clinical Research With Large Language Models Generated Writing- Clinical Research with AI-assisted Writing (CRAW) Study                               | 2023             | 10.1097/CCE.00000000000000975 | No: other purpose: AI-assisted writing                                                 |
| Yang H, Hu M, Most A, Hawkins WA, Murray B, Smith SE, Li S, Sikora A.                                                                                                                    | Evaluating accuracy and reproducibility of large language model performance on critical care assessments in pharmacy education                        | 2025             | 10.3389/frai.2024.1514896     | No: other purpose: pharmacy education                                                  |
| Doshi R, Amin KS, Khosla P, Bajaj SS, Chheang S, Forman HP.                                                                                                                              | Quantitative Evaluation of Large Language Models to Streamline Radiology Report Impressions: A Multimodal Retrospective Analysis                      | 2024             | 10.1148/radiol.231593         | No: other area: simplify radiology report impressions                                  |
| <b>CINAHL</b>                                                                                                                                                                            |                                                                                                                                                       |                  |                               |                                                                                        |

| Authors                                                                                                                                                                                                                                                                                                                                            | Title                                                                                                                                                                                                               | Publication year | DOI                                | Reason for exclusion                                                                                                                                |
|----------------------------------------------------------------------------------------------------------------------------------------------------------------------------------------------------------------------------------------------------------------------------------------------------------------------------------------------------|---------------------------------------------------------------------------------------------------------------------------------------------------------------------------------------------------------------------|------------------|------------------------------------|-----------------------------------------------------------------------------------------------------------------------------------------------------|
| Baum, Aaron ; Batniji, Rajaie ; Ratcliffe, Hannah ; DeGosztonyi, Margalit ; Basu, Sanjay                                                                                                                                                                                                                                                           | Supporting Rising-Risk Medicaid Patients Through Early Intervention                                                                                                                                                 | 20250201         | 10.3390/nursrep15020055            | No: other area: supporting rising-risk Medicaid patients                                                                                            |
| Alderden, Jenny ; Johnny, Jace ; Brooks, Katie R. ; Wilson, Andrew ; Yap, Tracey L. ; Zhao, Yunchuan ; van der Laan, Mark ; Kennerly, Susan                                                                                                                                                                                                        | Explainable Artificial Intelligence for Early Prediction of Pressure Injury Risk.                                                                                                                                   | 20241101         | 10.1056/CAT.24.0060                | No: no generative model used for outcome prediction, but synthetic data used for the dashboard, Hospital-acquired pressure injuries, synthetic data |
| Gondode, Prakash G. ; Khanna, Puneet ; Sharma, Pradeep ; Duggal, Sakshi ; Garg, Neha                                                                                                                                                                                                                                                               | End-of-life Care Patient Information Leaflets--A Comparative Evaluation of Artificial Intelligence-generated Content for Readability, Sentiment, Accuracy, Completeness, and Suitability: ChatGPT vs Google Gemini. | 20240901         | 10.4037/ajcc2024856                | No: artificial intelligence (AI) in addressing the informational gap by analyzing patient information leaflets                                      |
| Decker, Hannah ; Trang, Karen ; Ramirez, Joel ; Colley, Alexis ; Pierce, Logan ; Coleman, Melissa ; Bongiovanni, Tasce ; Melton, Genevieve B. ; Wick, Elizabeth                                                                                                                                                                                    | Large Language Model-Based Chatbot vs Surgeon-Generated Informed Consent Documentation for Common Procedures.                                                                                                       | 20231001         | 10.1177/02676591221116491          | No: LLM-based chatbot generated more readable, complete, and accurate consent documentation than the surgeons                                       |
| Mateo, Joaquim ; Payen, Didier ; Ghout, Idir ; Vallée, Fabrice ; Lescot, Thomas ; Welschbillig, Stephane ; Tazarourte, Karim ; Azouvi, Philippe ; Weiss, Jean-Jacques ; Aegerter, Philippe ; Vigué, Bernard                                                                                                                                        | Impact of extended monitoring-guided intensive care on outcome after severe traumatic brain injury: A prospective multicentre cohort study (PariS-TBI study).                                                       | 20231009         | 10.1001/jamanetworkopen.2023.36997 | No: low level of monitoring (LLM)                                                                                                                   |
| Gillies, Christopher E. ; Taylor, Daniel F. ; Cummings, Brandon C. ; Ansari, Sardar ; Islim, Fadi ; Kronick, Steven L. ; Medlin, Richard P. ; Ward, Kevin R. ; Medlin, Richard P Jr                                                                                                                                                                | Demonstrating the consequences of learning missingness patterns in early warning systems for preventative health care: A novel simulation and solution.                                                             | 20171101         | 10.1080/02699052.2017.1370554      | No: early warning systems for preventative health care                                                                                              |
| Glass, Hannah C. ; Wood, Thomas R. ; Comstock, Bryan A. ; Numis, Adam L. ; Bonifacio, Sonia L. ; Cornet, Marie-Coralie ; Gonzalez, Fernando F. ; Morell, Adriana ; Kolnik, Sarah E. ; Li, Yi ; Mathur, Amit ; Mietzsch, Ulrike ; Wu, Tai-Wei ; Wusthoff, Courtney J. ; Thoresen, Marianne ; Heagerty, Patrick J. ; Juul, Sandra E. ; Wu, Yvonne W. | Predictors of Death or Severe Impairment in Neonates With Hypoxic-Ischemic Encephalopathy.                                                                                                                          | 20201001         | 10.1016/j.jbi.2020.103528          | No: no generative model                                                                                                                             |
| Khubchandani, Jasmine A. ; Ingraham, Angela M. ; Daniel, Vijaya T. ; Ayturk, Didem ; Kiefe,                                                                                                                                                                                                                                                        | Geographic Diffusion and Implementation of Acute Care Surgery: An Uneven Solution to the                                                                                                                            | 20241205         | 10.1001/jamanetworkopen.2024.49188 | No: other area                                                                                                                                      |

| Authors                                                                                                                                                                                                                                                                                                                                                                                    | Title                                                                                                                                                             | Publication year | DOI                                | Reason for exclusion                                |
|--------------------------------------------------------------------------------------------------------------------------------------------------------------------------------------------------------------------------------------------------------------------------------------------------------------------------------------------------------------------------------------------|-------------------------------------------------------------------------------------------------------------------------------------------------------------------|------------------|------------------------------------|-----------------------------------------------------|
| Catarina I. ; Santry, Heena P.                                                                                                                                                                                                                                                                                                                                                             | National Emergency General Surgery Crisis.                                                                                                                        |                  |                                    |                                                     |
| Sarton, Benjamine ; Jaquet, Pierre ; Belkacemi, Djida ; de Montmollin, Etienne ; Bonneville, Fabrice ; Sazio, Charline ; Frérou, Aurelien ; Conrad, Marie ; Daubin, Delphine ; Chabanne, Russell ; Argaud, Laurent ; Dailler, Frédéric ; Brulé, Noëlle ; Lerolle, Nicolas ; Maestraggi, Quentin ; Marechal, Julien ; Bailly, Pierre ; Razazi, Keyvan ; Mateos, Francois ; Guidet, Bertrand | Assessment of Magnetic Resonance Imaging Changes and Functional Outcomes Among Adults With Severe Herpes Simplex Encephalitis.                                    | 20180201         | 10.1001/jamasurg.2017.3799         | No: no generative model                             |
| Berghöfer, Anne ; Afraz, Farideh C. ; Dreher, Carsten                                                                                                                                                                                                                                                                                                                                      | Regional global budgets to promote integrated mental health care in Germany...22nd International Conference on Integrated Care, May 23-25, 2022, Odense, Denmark. | 20210727         | 10.1001/jamanetworkopen.2021.14328 | No: other area                                      |
| Taylor-Piliae RE                                                                                                                                                                                                                                                                                                                                                                           | Establishing evidence-based practice: issues and implications in critical care nursing.                                                                           | 20221002         | 10.5334/ijic.ICIC22194             | No: no generative model                             |
| <b>Google scholar</b>                                                                                                                                                                                                                                                                                                                                                                      |                                                                                                                                                                   |                  |                                    |                                                     |
| Hajijama, Sameera; Juneja, Deven; Nasa, Prashant;                                                                                                                                                                                                                                                                                                                                          | Large Language Model in Critical Care Medicine: Opportunities and Challenges                                                                                      | 2024             | 10.5005/jp-journals-10071-24743    | No study, comment                                   |
| Hwai, Haw; Ho, Yi-Ju; Wang, Chih-Hung; Huang, Chien-Hua;                                                                                                                                                                                                                                                                                                                                   | Large language model application in emergency medicine and critical care                                                                                          | 2024             | 10.1016/j.jfma.2024.08.032         | No study, comment                                   |
| Fehr, Joël;                                                                                                                                                                                                                                                                                                                                                                                | LLaMA-Care A Multimodal Medical Large Language Model for Hospital Discharge Instruction Generation                                                                | 2024             | 10.48550/arXiv.2406.02350          | No: other purpose: discharge instruction generation |
| <b>arXiv</b>                                                                                                                                                                                                                                                                                                                                                                               |                                                                                                                                                                   |                  |                                    |                                                     |
| Braja Gopal Patra, Lauren A. Lepow, Praneet Kasi Reddy Jagadeesh Kumar, Veer Vekaria, Mohit Manoj Sharma, Prakash Adekkanattu, Brian Fennessy, Gavin Hynes, Isotta Landi, Jorge A. Sanchez-Ruiz, Euijung Ryu, Joanna M. Biernacka, Girish N. Nadkarni, Ardesheer Talati, Myrna Weissman, Mark Olfson, J. John Mann, Alexander W. Charney, Jyotishman Pathak                                | Extracting Social Support and Social Isolation Information from Clinical Psychiatry Notes: Comparing a Rule-based NLP System and a Large Language Model           | 2024             | 10.1093/jamia/ocae260              | No: other area: Psychiatry                          |
| Angela Zhang, Mert Yuksekgonul, Joshua Guild, James Zou, Joseph C. Wu                                                                                                                                                                                                                                                                                                                      | ChatGPT Exhibits Gender and Racial Biases in Acute Coronary Syndrome Management                                                                                   | 2023             | 10.48550/arXiv.2311.14703          | No: other area: gender and racial biases of ChatGPT |
